# Supplementary material for: FENDRR Sponges miR-424-5p to Inhibit Cell Proliferation, Migration and Invasion in Colorectal Cancer
Source: PubMed Central journal article supplement — Technol Cancer Res Treat. 2020 Dec 24;19:1533033820980102. doi: 10.1177/1533033820980102 (PMC7768317; doi:10.1177/1533033820980102), 2020-12-24
Supplement: Supplemental_file.pdf [file Supplemental_file.pdf]

**Supplementary Table 1 Primer sequence in qRT-PCR**

| Gene       | Sequence                                                                      |
|------------|-------------------------------------------------------------------------------|
| FENDRR     | F: 5'- CCACA TGGATGGTTG CCACT CTC-3'<br>R: 5'- GCTGG TACTCGGCCT TCTAA TTGG-3' |
| GAPDH      | F: 5'- GGAGCGAGATCCCTCCAAAAT-3'<br>R: 5'- GGCTGTTGTCATACTTCTCATGG-3'          |
| miR-424-5p | F: 5'- CAGCAGCAATTCATGT -3'<br>R: 5'- TGGTGTCGTGGAGTCG--3'                    |
| U6         | F: 5'- CTCGCTTCGGGCAGCACA-3'<br>R: 5'- AACGCTTCACGAATTTGCGT-3'                |
